# Supplementary material for: Determination of selenium-containing species, including nanoparticles, in selenium-enriched Lingzhi mushrooms
Source: Springer Nature journal article supplement (doi:10.1007/s00216-023-05031-9), 2023-11-21
Supplement: MOESM1 [file 216_2023_5031_MOESM1_ESM.pdf]

Supplementary Information for:

**Determination of Selenium-Containing Species, Including Nanoparticles, in Selenium-Enriched *Lingzhi* Mushrooms**

Kelly L. LeBlanc<sup>1\*</sup>, Tantima Kumlung<sup>2</sup>, Andrés Suárez Priede<sup>3</sup>, Paramee Kumkrong<sup>1,2</sup>, Thippaya Junvee<sup>2</sup>, Suladda Deawtong<sup>2</sup>, Jörg Bettmer<sup>3</sup>, María Montes-Bayón<sup>3</sup>, Zoltan Mester<sup>1</sup>

<sup>1</sup> National Research Council Canada; 1200 Montreal Road, Ottawa, Ontario, Canada

<sup>2</sup> Thailand Institute of Scientific and Technological Research, 35 Moo 3, Klong 5, Khlong Luang, Pathum Thani, 12120, Thailand

<sup>3</sup> University of Oviedo, Faculty of Chemistry, Dept. of Physical and Analytical Chemistry and Instituto de Investigación Sanitaria Del Principado de Asturias (ISPA), C/Julián Clavería 8, E-33006, Oviedo, Spain

\* Corresponding Author Email: Kelly.LeBlanc@nrc-cnrc.gc.ca

**Contents of the Supplementary Information**

|         |                                                                                                                                                                                                                                                                                                                  |
|---------|------------------------------------------------------------------------------------------------------------------------------------------------------------------------------------------------------------------------------------------------------------------------------------------------------------------|
| Page S2 | Table S1: Operating conditions of the iCAP™ TQ ICP-MS for single particle measurements                                                                                                                                                                                                                           |
| Page S3 | Figure S1: Photos of <i>G. lingzhi</i> fruiting bodies of a control mushroom and a mushroom grown in the presence of 100 mg Se kg <sup>-1</sup> substrate                                                                                                                                                        |
| Page S4 | Figure S2: HPLC-ICP-MS chromatogram (C18 column) of a water extract from a sample of Lingzhi mycelium exposed to 20 mg Se kg <sup>-1</sup> during growth<br><br>Figure S3: Histograms of the size distribution obtained by single particle ICP-MS in function of the concentration of selenite used for exposure |
| Page S5 | Figure S4: Transmission electron microscopy image of a mycelium extract after exposure to 50 mg Se kg <sup>-1</sup> as selenite                                                                                                                                                                                  |
|         | References                                                                                                                                                                                                                                                                                                       |

Table S1: Operating conditions of the iCAP™ TQ ICP-MS for single particle measurements

| Parameter                       | Value                                                                           |
|---------------------------------|---------------------------------------------------------------------------------|
| Coolant gas flow (Ar) (L/min)   | 14                                                                              |
| Auxiliary gas flow (Ar) (L/min) | 0.8                                                                             |
| Carrier gas flow (Ar) (L/min)   | 0.52                                                                            |
| Sheath gas flow (Ar) (L/min)    | 0.48                                                                            |
| Sample flow rate ( $\mu$ L/min) | 10                                                                              |
| Dwell time (s)                  | 0.005                                                                           |
| Measurement time (s)            | 120                                                                             |
| Q1 masses (u)                   | 80 ( $^{80}\text{Se}^+$ ) or 31 ( $^{31}\text{P}^+$ )                           |
| Q3 masses (u)                   | 96 ( $^{80}\text{Se}^{16}\text{O}^+$ ) or 47 ( $^{31}\text{P}^{16}\text{O}^+$ ) |

To calculate the transport efficiency, the LGCQC5050 quality control material (AuNPs, LGC Standards Ltd., Teddington, UK) was used, with a numerical concentration specified in  $1.47 \times 10^{11}$  NPs/mL. A dilution was prepared in ultrapure  $\text{H}_2\text{O}$  to a final concentration around 30,000 NPs/mL. This suspension was measured by SP-ICP-MS, recording the signal for an m/z of 197 ( $^{197}\text{Au}^+$ ), and using the same conditions specified in table S1. The final determination of the transport efficiency was carried out following the particle frequency method as described by Pace et al. [1]. Quantitative data on the Se mass present in the individual particles were then obtained by an external calibration of an aqueous Se standard.

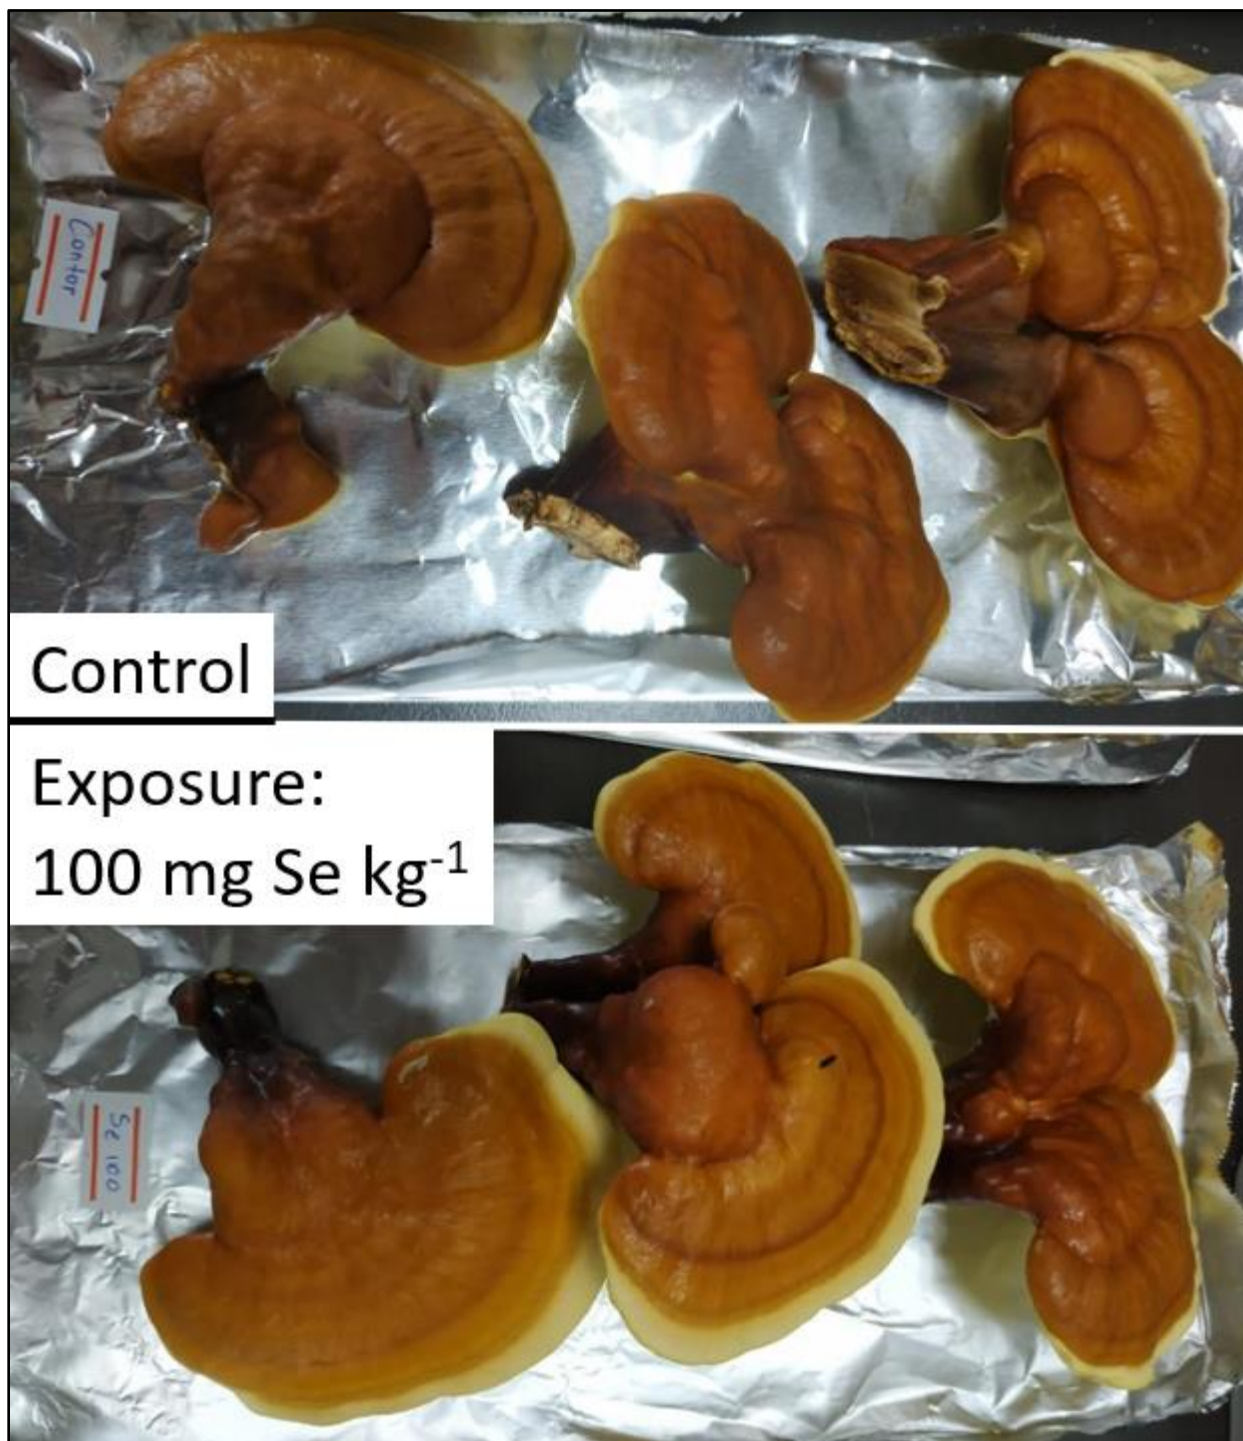

**Figure S1:** *G. lingzhi* fruiting body of control mushroom (top) and mushroom grown in the presence of 100 mg Se kg<sup>-1</sup> substrate (bottom)

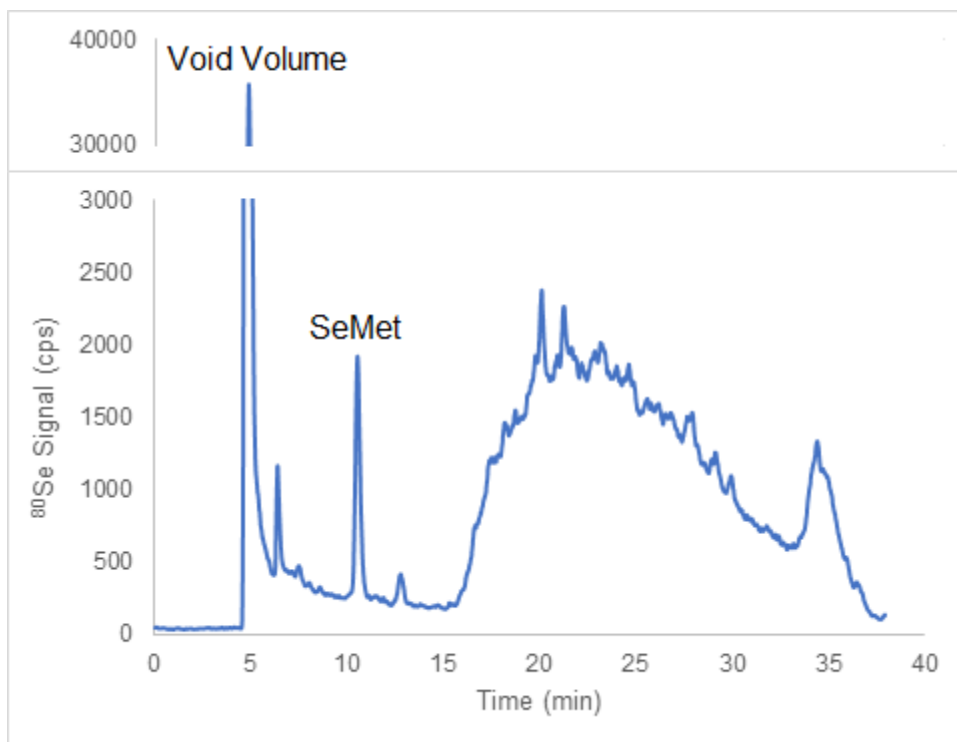

**Figure S2:** HPLC-ICP-MS chromatogram (C18 column) of a water extract from a sample of *Lingzhi* mycelium exposed to 20 mg Se kg<sup>-1</sup> during growth

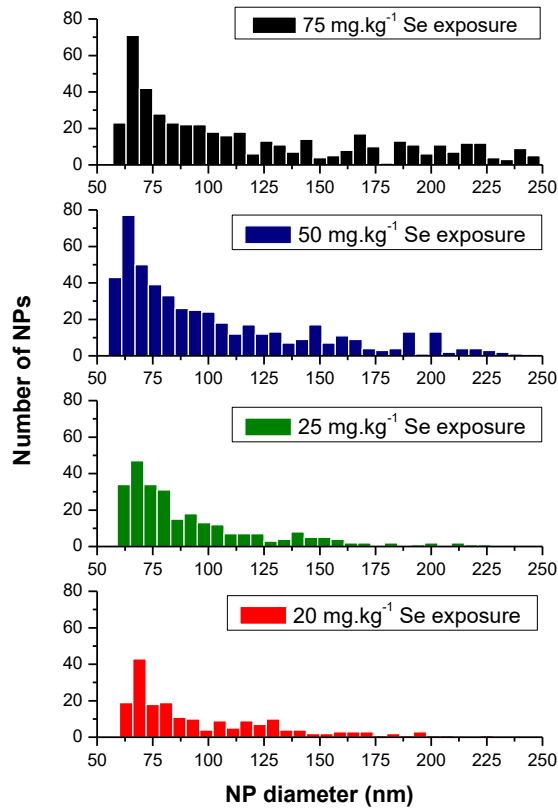

**Figure S3:** Histograms of the size distribution obtained by single particle ICP-MS in function of the concentration of selenite used for exposure (bin size: 6 nm)

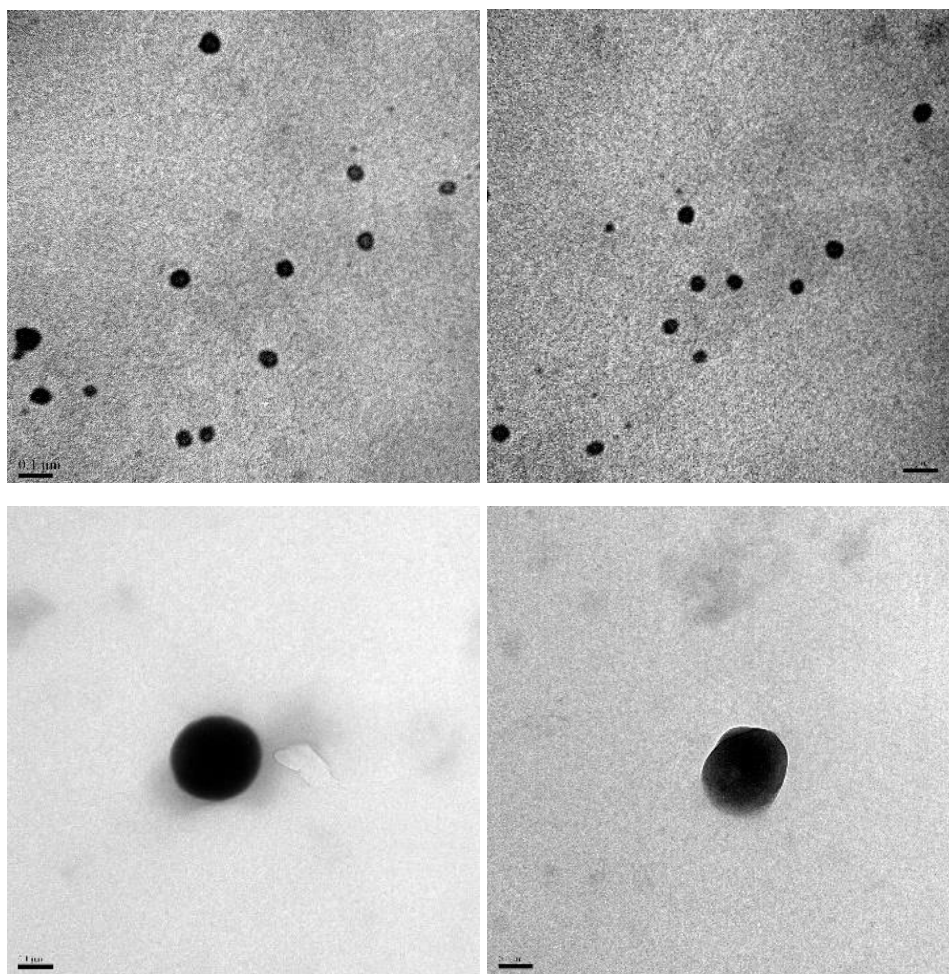

**Figure S4:** TEM images of a mycelium extract after exposure to  $50 \text{ mg Se kg}^{-1}$  as selenite (scale bar:  $0.1 \mu\text{m}$ )

#### References for SI:

- [1] H.E. Pace, N.J. Rogers, C. Larolimek, V.A. Coleman, C.P. Higgins, J.F. Ranville. Determining Transport Efficiency for the Purpose of Counting and Sizing Nanoparticles via Single Particle Inductively Coupled Plasma Mass Spectrometry. *Anal Chem* 2011, 83(24), 9361–9369. DOI: 10.1021/ac201952t
